# Supplementary material
Source: PubMed Central journal article supplement (PMC5330848)
Supplement: NIHMS840194-supplement-Supp_publication_material.pdf [file NIHMS840194-supplement-Supp_publication_material.pdf]

# **SUPPLEMENTAL MATERIAL**

**A**

**The ESC algorithm for diagnosis of HFpEF**

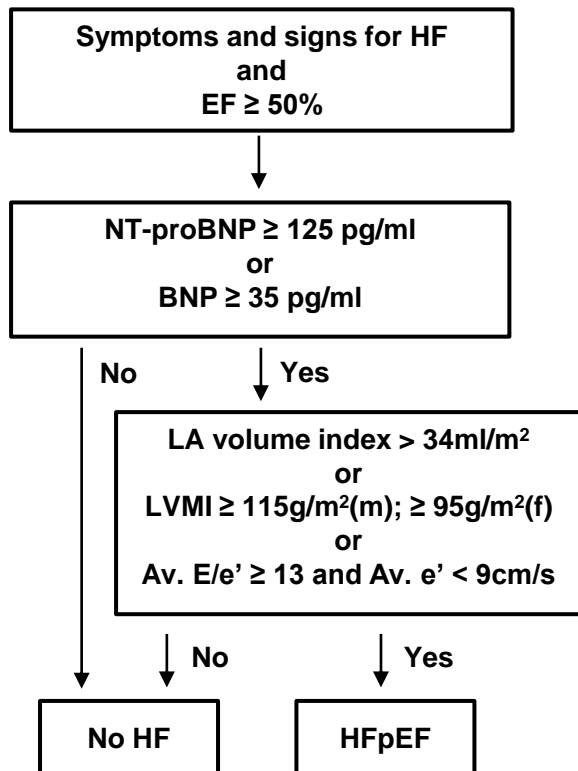**B**

**The ASE/EACVI guidelines for assessment of Diastolic Dysfunction**

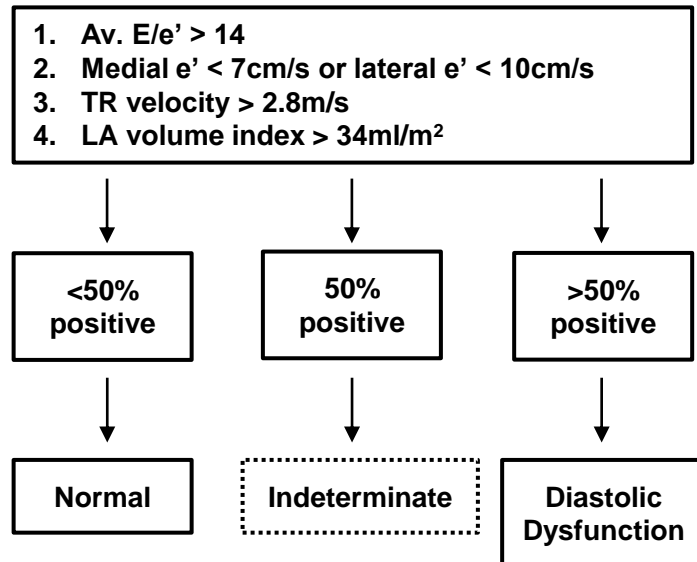

**Supplemental figure 1. Diagnostic Schemes for HFpEF from Current Guidelines.** Algorithms show positive diagnostic criteria for HFpEF/diastolic dysfunction according to ESC (**A**) and ASE/EACVI guidelines (**B**). Av. Indicates average; LVMI, left ventricular mass index; and other abbreviations as in Figures 1, 5 and 6.
